# Supplementary material for: Co-Evolution of Social Learning and Evolutionary Preparedness in Dangerous Environments
Source: PubMed Central journal article supplement (PMC4972391; doi:10.1371/journal.pone.0160245), 2016-08-03

$P_{change} = 0$ 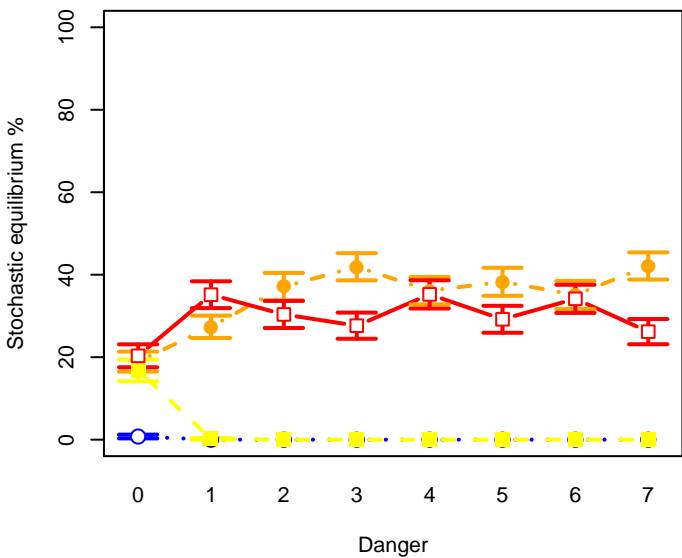 $P_{change} = 0.005$ 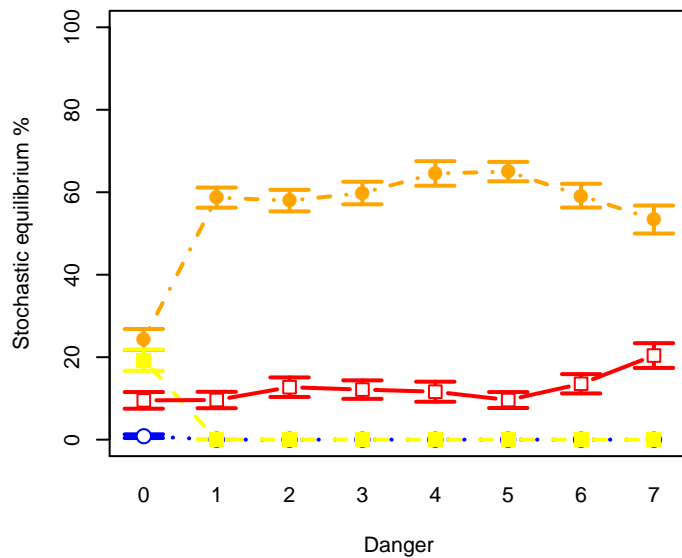 $P_{change} = 0.05$ 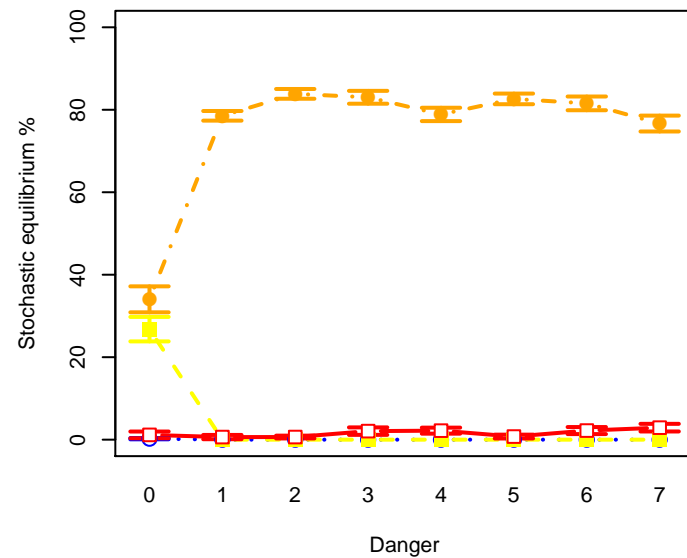 $P_{change} = 0$ 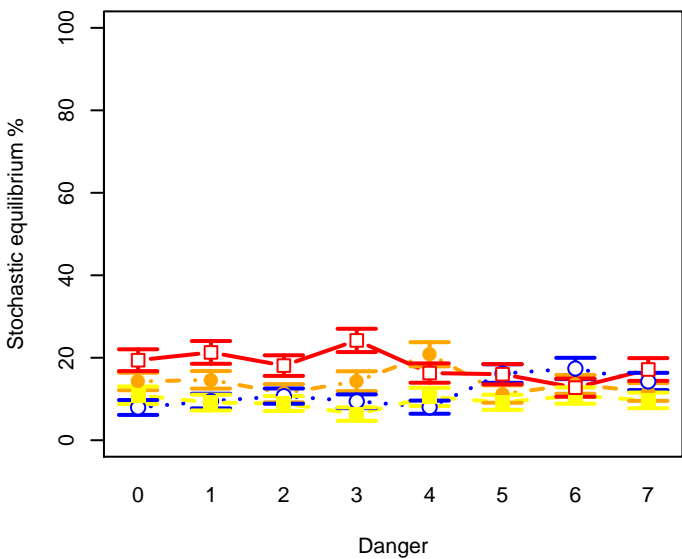 $P_{change} = 0.005$ 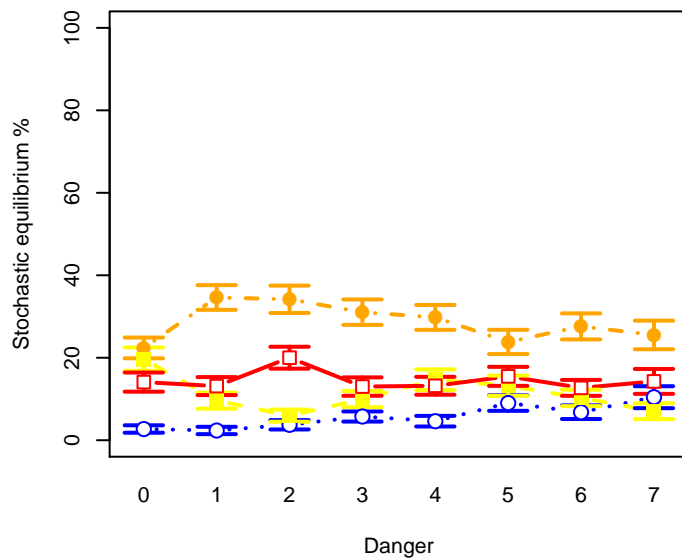 $P_{change} = 0.05$ 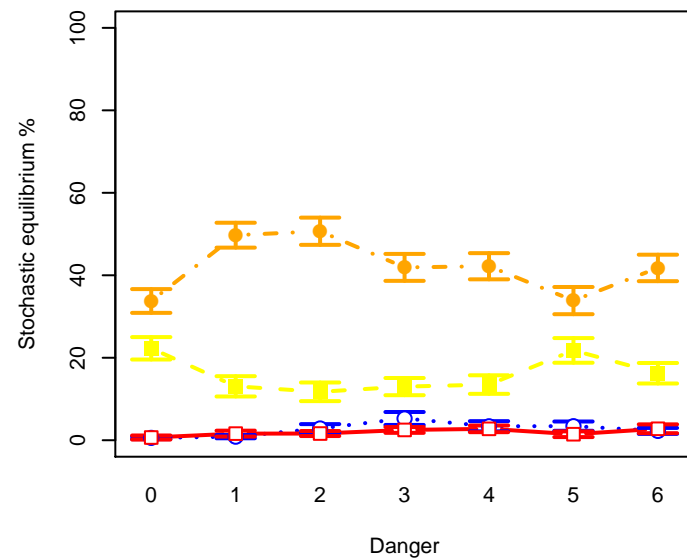

Supplement: pone.0160245.s004.pdf [file pone.0160245.s004.pdf]
